# Supplementary material for: A promising strategy for investigating the anti-aging effect of natural compounds: a case study of caffeoylquinic acids
Source: Royal Society of Chemistry journal article supplement (doi:10.1039/d1fo01383a), 2021-01-01
Supplement: d1fo01383a1.pdf [file d1fo01383a1.pdf]

**A promising strategy of investigating anti-aging effect of natural  
compounds: A case study of caffeoylquinic acids**

**Rong Li<sup>1</sup>, Mingfang Tao<sup>1</sup>, Ting Wu<sup>1</sup>, Zhuo Zhang<sup>1</sup>, Tingting Xu<sup>1</sup>, Siyi Pan<sup>1</sup>,  
Xiaoyun Xu<sup>1\*</sup>**

<sup>1</sup> Key Laboratory of Environment Correlative Dietology (Ministry of Education),  
College of Food Science and Technology, Huazhong Agricultural University, Wuhan  
430070, People's Republic of China.

**\* Correspondence:**

Prof. Xiaoyun Xu, Ph. D. Key Laboratory of Environment Correlative Dietology  
(Ministry of Education), College of Food Science and Technology, Huazhong  
Agricultural University, Wuhan 430070, People's Republic of China.

E-mail: xuxiaoyun@mail.hzau.edu.cn; Tel: (86) 27-87671056

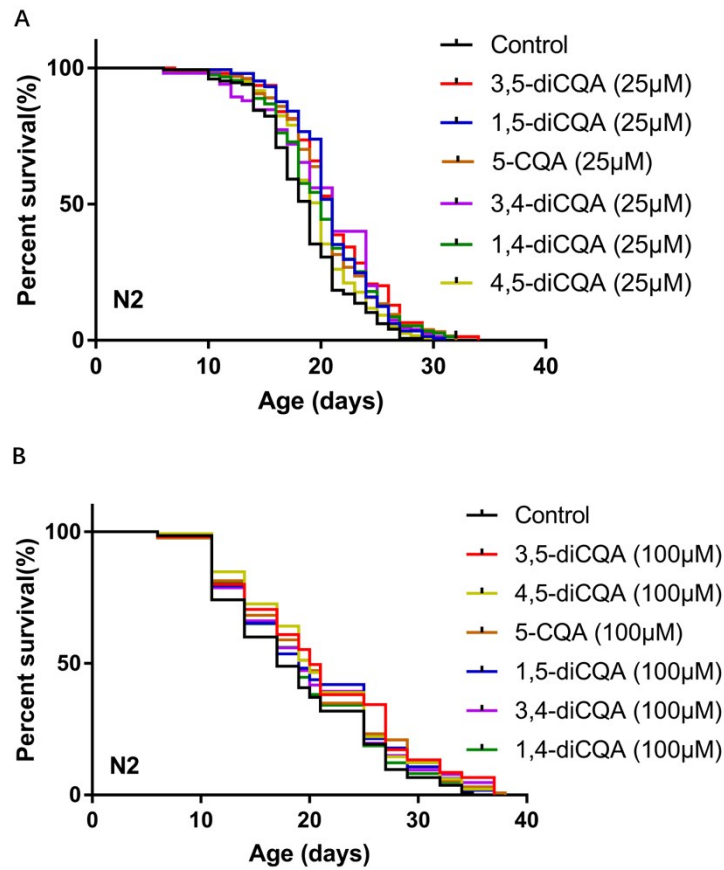

**Supplementary Fig. S1** Survival curves of wild type worms treated with 0.1% DMSO (Control) or caffeoylquinic acid isomers at concentrations of (A) 25  $\mu$ M and (B) 100  $\mu$ M at 20 $^{\circ}$ C.

**Supplementary Table S1.** Effect of Caffeoylquinic acids on the lifespan of *C. elegans* at 20°C.

| Strains | Treatment ( $\mu$ M) | Mean lifespan (d) ( $\pm$ SEM) | Worm number | Change (%) | <i>p</i> value |
|---------|----------------------|--------------------------------|-------------|------------|----------------|
| N2      | Control              | 18.61 $\pm$ 0.34               | 147         | □          | -              |
|         | 3,5-diCQA (25)       | 21.08 $\pm$ 0.36               | 155         | 13.27      | < 0.0001(****) |
|         | 1,5-diCQA (25)       | 20.87 $\pm$ 0.32               | 145         | 12.14      | < 0.0001(****) |
|         | 5-CQA (25)           | 20.53 $\pm$ 0.37               | 127         | 10.32      | 0.0001(***)    |
|         | 3,4-diCQA (25)       | 20.30 $\pm$ 0.42               | 147         | 9.08       | < 0.0001(****) |
|         | 1,4-diCQA (25)       | 20.07 $\pm$ 0.39               | 149         | 7.84       | 0.0020(**)     |
|         | 4,5-diCQA (25)       | 19.65 $\pm$ 0.36               | 119         | 5.59       | 0.0674(ns)     |
| N2      | Control              | 18.84 $\pm$ 0.61               | 135         |            |                |
|         | 3,5-diCQA (100)      | 21.01 $\pm$ 0.78               | 105         | 11.52      | 0.0059(**)     |
|         | 4,5-diCQA (100)      | 20.79 $\pm$ 0.62               | 137         | 10.35      | 0.0433(*)      |
|         | 5-CQA (100)          | 20.42 $\pm$ 0.68               | 129         | 8.39       | 0.0459(*)      |
|         | 1,5-diCQA (100)      | 20.21 $\pm$ 0.72               | 112         | 7.27       | 0.1037(ns)     |
|         | 3,4-diCQA (100)      | 20.13 $\pm$ 0.68               | 127         | 6.85       | 0.0918(ns)     |
|         | 1,4-diCQA (100)      | 19.59 $\pm$ 0.65               | 123         | 3.98       | 0.3727(ns)     |

**Supplementary Table S2.** Primers used in this research.

| Gene            | Primers                                                |
|-----------------|--------------------------------------------------------|
| <i>act-1</i>    | F: CATGAAGATCAAGATCATCGCC<br>R: GTGACGATGGTTTTGAACTTGT |
| <i>daf-2</i>    | F: GTTCGCTGACAATCTCATTGT<br>R: CAGTAATTTACGTAGATGCGG   |
| <i>age-1</i>    | F: CGAGATCGTCAACCGTTTATTC<br>R: TTCCACATTACTTCGTAGGCTT |
| <i>daf-16</i>   | F: GGAGCATTTGATAACGTTCCAT<br>R: GTAGTTGCATCGATACGCATTT |
| <i>sod-3</i>    | F: GATTTGGAACCTGTAATCAGCC<br>R: GTGAAGTTTCTCCTCGATCTGA |
| <i>ctl-1</i>    | F: GACGTATCCAAAACCCCAAGTG<br>R: TTGGCATGAACGACACGCTC   |
| <i>hsp-16.2</i> | F: GTACGCTATCAATCCAAGGAGA<br>R: GGAATTGATCTTCCTTGAACCG |
